# Supplementary material for: Synthesis and Evaluation of Saccharide-Based Aliphatic and Aromatic Esters as Antimicrobial and Antibiofilm Agents
Source: Pharmaceuticals (Basel). 2019 Dec 17;12(4):186. doi: 10.3390/ph12040186 (PMC6958352; doi:10.3390/ph12040186)
Supplement: Supplementary file 1 [file pharmaceuticals-12-00186-s001.pdf]

## Supplementary material

### Synthesis and evaluation of saccharide-based aliphatic and aromatic esters as antimicrobial and antibiofilm agents

Raffaella Campana<sup>a</sup>, Alessio Merli<sup>a</sup>, Michele Verboni<sup>a</sup>, Francesca Biondo<sup>a</sup>, Gianfranco Favi<sup>a</sup>,

Andrea Duranti<sup>a\*</sup> and Simone Lucarini<sup>a\*</sup>

<sup>a</sup>Department of Biomolecular Sciences, University of Urbino Carlo Bo, 61029, Urbino (PU), Italy.

\* Corresponding authors.

*E-mail addresses:* [andrea.duranti@uniurb.it](mailto:andrea.duranti@uniurb.it) (A. Duranti) and [simone.lucarini@uniurb.it](mailto:simone.lucarini@uniurb.it) (S. Lucarini)

#### Table of Contents

|    |                                                                                                  |    |
|----|--------------------------------------------------------------------------------------------------|----|
| 1. | Characterization of glucose and mannose fatty acid ester derivatives <b>7b–e</b> and <b>8b–e</b> | S2 |
| 2. | Scheme S1: Synthesis of triphenylacetic acid ( <b>1i</b> ).                                      | S6 |
| 3. | References                                                                                       | S7 |

## 1. Characterization of glucose and mannose fatty acid ester derivatives 7b–e and 8a–e.

### 6-*O*-Decanoyl-D-mannopyranose (mannose caprate, URB1390) (7b) [1]

Yield = 59%,  $\alpha/\beta$  = 1:0.5.  $^1\text{H}$  NMR (400 MHz, DMSO):  $\delta$  = 0.86 (t, 3H+1.5H,  $J$  = 6.5 Hz,  $\text{CH}_3$ ), 1.24–1.26 (m, 12H+6H), 1.49–1.53 (m, 2H+1H,  $\text{OCCH}_2\text{CH}_2$ ), 2.25–2.31 (m, 2H+1H,  $\text{OCCH}_2\text{CH}_2$ ), 3.21–3.32 (m, 1.5H,  $\text{H}^{3\beta}$ ,  $\text{H}^{4\beta}$ ,  $\text{H}^{5\beta}$ ), 3.35–3.41 (m, 1H,  $\text{H}^{4\alpha}$ ), 3.49–3.56 (m, 2H+0.5H,  $\text{H}^{2\alpha}$ ,  $\text{H}^{3\alpha}$ ,  $\text{H}^{2\beta}$ ), 3.70 (ddd, 1H,  $J_{\text{H}^{5\alpha}-\text{H}^{6\beta\alpha}}$  = 1.5 Hz,  $J_{\text{H}^{5\alpha}-\text{H}^{6\alpha\alpha}}$  = 7.0 Hz,  $J_{\text{H}^{5\alpha}-\text{H}^{4\alpha}}$  = 9.0 Hz,  $\text{H}^{5\alpha}$ ), 3.94–4.01 (m, 1H+0.5H,  $\text{H}^{6\alpha\alpha}$ ,  $\text{H}^{6\alpha\beta}$ ), 4.27–4.32 (m, 1H+0.5H,  $\text{H}^{6\beta\alpha}$ ,  $\text{H}^{6\beta\beta}$ ), 4.53–4.59 (m, 1H+1H,  $\text{OH}^{2\alpha}$ ,  $\text{H}^{1\beta}$ ,  $\text{OH}^{2\beta}$ ), 4.63 (d, 1H,  $J_{\text{OH}^{3\alpha}-\text{H}^{3\alpha}}$  = 4.5 Hz,  $\text{OH}^{3\alpha}$ ), 4.66 (d, 0.5H,  $J_{\text{OH}^{3\beta}-\text{H}^{3\beta}}$  = 5.5 Hz,  $\text{OH}^{3\beta}$ ), 4.86 (dd, 1H,  $J_{\text{H}^{1\alpha}-\text{H}^{2\alpha}} \approx J_{\text{H}^{1\alpha}-\text{OH}^{1\alpha}}$  = 4.5 Hz,  $\text{H}^{1\alpha}$ ), 4.89 (d, 1H,  $J_{\text{OH}^{4\alpha}-\text{H}^{4\alpha}}$  = 6.0 Hz,  $\text{OH}^{4\alpha}$ ), 4.94 (d, 0.5H,  $J_{\text{OH}^{4\beta}-\text{H}^{4\beta}}$  = 5.0 Hz,  $\text{OH}^{4\beta}$ ), 6.26 (d, 0.5H,  $J_{\text{OH}^{1\beta}-\text{H}^{1\beta}}$  = 8.0 Hz,  $\text{OH}^{1\beta}$ ), 6.37 (d, 1H,  $J_{\text{OH}^{1\alpha}-\text{H}^{1\alpha}}$  = 5.0 Hz,  $\text{OH}^{1\alpha}$ ) ppm.  $^{13}\text{C}$  NMR (100 MHz, DMSO):  $\delta$  = 14.4 (1.5C), 22.6 (1.5C), 24.9 (1.5C), 28.9 (1.5C), 29.1 (1.5C), 29.2 (1.5C), 29.3 (1.5C), 31.7 (1.5C), 33.9 (1.5C), 64.7 (C6, 1.5C), 67.2 (C5, 0.5C), 67.6 (C5, 1C), 70.8 (C4, 1C), 70.9 (C3, 1C), 71.8 (C2, 1C), 72.0 (C2, 0.5C), 73.9 (C4, 0.5), 74.5 (C3, 0.5C), 94.5 (C1, 1C), 94.6 (C1, 0.5C), 173.5 (CO, 1.5C) ppm.

### 6-*O*-Dodecanoyl-D-mannopyranose (mannose laurate, URB1380) (7c) [1]

Yield = 12%,  $\alpha/\beta$  = 1:0.5.  $^1\text{H}$  NMR (400 MHz, DMSO):  $\delta$  = 0.86 (t, 3H+1.5H,  $J$  = 7.0 Hz,  $\text{CH}_3$ ), 1.24–1.26 (m, 16H+8H), 1.49–1.53 (m, 2H+1H,  $\text{OCCH}_2\text{CH}_2$ ), 2.25–2.30 (m, 2H+1H,  $\text{OCCH}_2\text{CH}_2$ ), 3.21–3.33 (m, 1.5H,  $\text{H}^{3\beta}$ ,  $\text{H}^{4\beta}$ ,  $\text{H}^{5\beta}$ ), 3.35–3.41 (m, 1H,  $\text{H}^{4\alpha}$ ), 3.49–3.55 (m, 2H+0.5H,  $\text{H}^{2\alpha}$ ,  $\text{H}^{3\alpha}$ ,  $\text{H}^{2\beta}$ ), 3.70 (ddd, 1H,  $J_{\text{H}^{5\alpha}-\text{H}^{6\beta\alpha}}$  = 1.5 Hz,  $J_{\text{H}^{5\alpha}-\text{H}^{6\alpha\alpha}}$  = 7.0 Hz,  $J_{\text{H}^{5\alpha}-\text{H}^{4\alpha}}$  = 9.0 Hz,  $\text{H}^{5\alpha}$ ), 3.94–4.02 (m, 1H+0.5H,  $\text{H}^{6\alpha\alpha}$ ,  $\text{H}^{6\alpha\beta}$ ), 4.27–4.32 (m, 1H+0.5H,  $\text{H}^{6\beta\alpha}$ ,  $\text{H}^{6\beta\beta}$ ), 4.53–4.59 (m, 1H+1H,  $\text{OH}^{2\alpha}$ ,  $\text{H}^{1\beta}$ ,  $\text{OH}^{2\beta}$ ), 4.63 (d, 1H,  $J_{\text{OH}^{3\alpha}-\text{H}^{3\alpha}}$  = 4.0 Hz,  $\text{OH}^{3\alpha}$ ), 4.66 (d, 0.5H,  $J_{\text{OH}^{3\beta}-\text{H}^{3\beta}}$  = 5.5 Hz,  $\text{OH}^{3\beta}$ ), 4.86 (dd, 1H,  $J_{\text{H}^{1\alpha}-\text{H}^{2\alpha}} \approx J_{\text{H}^{1\alpha}-\text{OH}^{1\alpha}}$  = 4.5 Hz,  $\text{H}^{1\alpha}$ ), 4.89 (d, 1H,  $J_{\text{OH}^{4\alpha}-\text{H}^{4\alpha}}$  = 5.5 Hz,  $\text{OH}^{4\alpha}$ ), 4.94 (d, 0.5H,  $J_{\text{OH}^{4\beta}-\text{H}^{4\beta}}$  = 5.0 Hz,  $\text{OH}^{4\beta}$ ), 6.26 (d, 0.5H,  $J_{\text{OH}^{1\beta}-\text{H}^{1\beta}}$  = 8.5 Hz,  $\text{OH}^{1\beta}$ ), 6.38 (d, 1H,  $J_{\text{OH}^{1\alpha}-\text{H}^{1\alpha}}$  = 4.5 Hz,  $\text{OH}^{1\alpha}$ ) ppm.  $^{13}\text{C}$  NMR (100 MHz, DMSO):  $\delta$  = 14.4 (1.5C), 22.6 (1.5C), 24.9 (1.5C), 28.9 (1.5C), 29.17 (1.5C), 29.20 (1.5), 29.4

(1.5), 29.5, 31.8 (1.5C), 33.88 (0.5C), 33.93 (1C), 64.6 (C6, 0.5C), 64.7 (C6, 1C), 67.3 (C5, 0.5C), 67.6 (C5, 1C), 70.8 (C4, 1C), 70.9 (C3, 1C), 71.8 (C2, 1C), 72.0 (C2, 0.5C), 73.9 (C4, 0.5), 74.5 (C3, 0.5C), 94.5 (C1, C), 94.6 (C1, 0.5C), 173.5 (CO, 1.5C) ppm.

**(2R,3S,4S,5S,6S)-6-O-Tetradecanoyl-D-mannopyranose and (2R,3S,4S,5S,6R)-6-O-tetradecanoyl-D-mannopyranose (mannose myristate, URB1381) (7d) [1]**

Yield = 60%,  $\alpha/\beta = 1:0.5$ .  $^1\text{H}$  NMR (400 MHz, DMSO):  $\delta = 0.86$  (t, 3H+1.5H,  $J = 6.5$  Hz,  $\text{CH}_3$ ), 1.24–1.26 (m, 20H+10H), 1.50–1.53 (m, 2H+1H,  $\text{OCCH}_2\text{CH}_2$ ), 2.26–2.31 (m, 2H+1H,  $\text{OCCH}_2\text{CH}_2$ ), 3.21–3.33 (m, 1.5H,  $\text{H}^{3\beta}$ ,  $\text{H}^{4\beta}$ ,  $\text{H}^{5\beta}$ ), 3.35–3.41 (m, 1H,  $\text{H}^{4\alpha}$ ), 3.49–3.55 (m, 2H+0.5H,  $\text{H}^{2\alpha}$ ,  $\text{H}^{3\alpha}$ ,  $\text{H}^{2\beta}$ ), 3.70 (ddd, 1H,  $J_{\text{H}^{5\alpha}-\text{H}^{6\beta\alpha}} = 1.5$  Hz,  $J_{\text{H}^{5\alpha}-\text{H}^{6\alpha\alpha}} = 7.0$  Hz,  $J_{\text{H}^{5\alpha}-\text{H}^{4\alpha}} = 9.0$  Hz,  $\text{H}^{5\alpha}$ ), 3.94–4.02 (m, 1H+0.5H,  $\text{H}^{6\alpha\alpha}$ ,  $\text{H}^{6\alpha\beta}$ ), 4.27–4.32 (m, 1H+0.5H,  $\text{H}^{6\beta\alpha}$ ,  $\text{H}^{6\beta\beta}$ ), 4.53–4.59 (m, 1H+1H,  $\text{OH}^{2\alpha}$ ,  $\text{H}^{1\beta}$ ,  $\text{OH}^{2\beta}$ ), 4.63 (d, 1H,  $J_{\text{OH}^{3\alpha}-\text{H}^{3\alpha}} = 4.0$  Hz,  $\text{OH}^{3\alpha}$ ), 4.66 (d, 0.5H,  $J_{\text{OH}^{3\beta}-\text{H}^{3\beta}} = 5.5$  Hz,  $\text{OH}^{3\beta}$ ), 4.86 (dd, 1H,  $J_{\text{H}^{1\alpha}-\text{H}^{2\alpha}} \cong J_{\text{H}^{1\alpha}-\text{OH}^{1\alpha}} = 4.5$  Hz,  $\text{H}^{1\alpha}$ ), 4.89 (d, 1H,  $J_{\text{OH}^{4\alpha}-\text{H}^{4\alpha}} = 5.5$  Hz,  $\text{OH}^{4\alpha}$ ), 4.94 (d, 0.5H,  $J_{\text{OH}^{4\beta}-\text{H}^{4\beta}} = 5.0$  Hz,  $\text{OH}^{4\beta}$ ), 6.26 (d, 0.5H,  $J_{\text{OH}^{1\beta}-\text{H}^{1\beta}} = 8.5$  Hz,  $\text{OH}^{1\beta}$ ), 6.38 (d, 1H,  $J_{\text{OH}^{1\alpha}-\text{H}^{1\alpha}} = 4.5$  Hz,  $\text{OH}^{1\alpha}$ ) ppm.  $^{13}\text{C}$  NMR (100 MHz, DMSO):  $\delta = 14.4$  (1.5C), 22.6 (1.5C), 24.9 (1.5C), 29.0 (1.5C), 29.18 (1.5C), 29.21 (1.5), 29.38 (1.5), 29.5, 31.8 (1.5C), 33.9 (1.5C), 64.7 (C6, 1.5C), 67.3 (C5, 0.5C), 67.6 (C5, 1C), 70.8 (C4, 1.5C), 71.8 (C2, 1C), 72.0 (C2, 0.5C), 74.0 (C4, 0.5), 74.5 (C3, 0.5C), 94.5 (C1, C), 94.6 (C1, 0.5C), 173.4 (CO, 1.5C) ppm.

**(2R,3S,4S,5S,6S)-6-O-Esadecanoyl-D-mannopyranose and (2R,3S,4S,5S,6R)-6-O-esadecanoyl-D-mannopyranose (mannose palmitate, URB1382) (7e) [2]**

Yield = 32%,  $\alpha/\beta = 1:0.8$ . MS (ESI): 417.5 [M-H], 436.4 [M+NH<sub>4</sub>], 441.4 [M+Na].  $^1\text{H}$  NMR (400 MHz, DMSO):  $\delta = 0.86$  (t, 3H+2.4H,  $J = 6.5$  Hz,  $\text{CH}_3$ ), 1.24–1.26 (m, 24H+10H), 1.50–1.53 (m, 2H+1.6H,  $\text{OCCH}_2\text{CH}_2$ ), 2.25–2.30 (m, 2H+1.6H,  $\text{OCCH}_2\text{CH}_2$ ), 3.24–3.32 (m, 0.8x3H,  $\text{H}^{3\beta}$ ,  $\text{H}^{4\beta}$ ,  $\text{H}^{5\beta}$ ), 3.34–3.39 (m, 1H,  $\text{H}^{4\alpha}$ ), 3.51–3.56 (m, 2H+0.8H,  $\text{H}^{2\alpha}$ ,  $\text{H}^{3\alpha}$ ,  $\text{H}^{2\beta}$ ), 3.71 (ddd, 1H,  $J_{\text{H}^{5\alpha}-\text{H}^{6\beta\alpha}} = 1.5$  Hz,  $J_{\text{H}^{5\alpha}-\text{H}^{6\alpha\alpha}} = 7.0$  Hz,  $J_{\text{H}^{5\alpha}-\text{H}^{4\alpha}} = 9.0$  Hz,  $\text{H}^{5\alpha}$ ), 3.95–4.02 (m, 1H+0.8H,  $\text{H}^{6\alpha\alpha}$ ,  $\text{H}^{6\alpha\beta}$ ), 4.28–4.33 (m, 1H+0.8H,  $\text{H}^{6\beta\alpha}$ ,  $\text{H}^{6\beta\beta}$ ), 4.51–4.53 (m, 1H+0.8H,  $\text{OH}^{2\alpha}$ ,  $\text{H}^{1\beta}$ ), 4.57–4.59 (m, 1H+0.8H,  $\text{OH}^{3\alpha}$ ,  $\text{OH}^{2\beta}$ ),

4.62 (d, 0.8H,  $J_{\text{OH}3\beta\text{-H}3\beta} = 4.5$  Hz,  $\text{OH}^{3\beta}$ ), 4.84–4.87 (m, 2H,  $\text{H}^{1\alpha}$ ,  $\text{OH}^{4\alpha}$ ), 4.90 (d, 0.8H,  $J_{\text{OH}4\beta\text{-H}4\beta} = 4.5$  Hz,  $\text{OH}^{4\beta}$ ), 6.22 (d, 0.8H,  $J_{\text{OH}1\beta\text{-H}1\beta} = 8.5$  Hz,  $\text{OH}^{1\beta}$ ), 6.35 (d, 1H,  $J_{\text{OH}1\alpha\text{-H}1\alpha} = 4.5$  Hz,  $\text{OH}^{1\alpha}$ ) ppm.  $^{13}\text{C}$  NMR (100 MHz, DMSO):  $\delta = 14.4$  (1.8C), 22.6 (1.8C), 24.9 (1.8C), 29.0 (1.8C), 29.16 (1.8C), 29.20 (1.8C), 29.4 (1.8C), 29.47, 29.51, 31.8 (1.8C), 33.88 (0.8C), 33.93 (1C), 64.7 (C6, 1.8 C), 67.3 (C5, 0.8C), 67.6 (C5, 1C), 70.8 (C4, 1.8C), 71.8 (C3, 1C), 72.0 (C2, 1C), 74.0 (C4, 0.8), 74.5 (C3, 0.8C), 94.5 (C1, 1C), 94.6 (C1, 0.8C), 173.4 (CO, 1.8C) ppm.

**6-*O*-Decanoyl-D-glucopyranose (glucose caprate, URB1385) (8b) [3]**

Yield = 15%.  $^1\text{H}$  NMR (400 MHz, DMSO):  $\delta = 0.86$  (t, 3H,  $J = 7.0$  Hz,  $\text{CH}_3$ ), 1.22–1.28 (m, 12H), 1.48–1.54 (m, 2H,  $\text{OCCH}_2\text{CH}_2$ ), 2.28 (t, 2H,  $J = 7.5$  Hz,  $\text{OCCH}_2\text{CH}_2$ ), 3.03 (ddd, 1H,  $J_{\text{H}4\text{-OH}4} = 6.0$  Hz,  $J_{\text{H}4\text{-H}3} = 9.0$  Hz,  $J_{\text{H}4\text{-H}5} = 9.5$  Hz,  $\text{H}^4$ ), 3.13 (ddd, 1H,  $J_{\text{H}2\text{-H}1} = 4.0$  Hz,  $J_{\text{H}2\text{-OH}2} = 6.5$  Hz,  $J_{\text{H}2\text{-H}3} = 9.0$  Hz,  $\text{H}^2$ ), 3.43 (ddd, 1H,  $J_{\text{H}3\text{-OH}3} = 5.0$  Hz,  $J_{\text{H}3\text{-H}2} \cong J_{\text{H}3\text{-H}4} = 9.0$  Hz,  $\text{H}^3$ ), 3.77 (ddd, 1H,  $J_{\text{H}5\text{-H}6b} = 2.0$  Hz,  $J_{\text{H}5\text{-H}6a} = 6.0$  Hz,  $J_{\text{H}5\text{-H}4} = 9.5$  Hz,  $\text{H}^5$ ), 3.99 (dd, 1H,  $J_{\text{H}6a\text{-H}5} = 6.0$  Hz,  $J_{\text{H}6a\text{-H}6b} = 12.0$  Hz,  $\text{H}^{6a}$ ), 4.27 (dd, 1H,  $J_{\text{H}6b\text{-H}5} = 2.0$  Hz,  $J_{\text{H}6b\text{-H}6a} = 12.0$  Hz,  $\text{H}^{6b}$ ), 4.54 (d, 1H,  $J_{\text{OH}2\text{-H}2} = 6.5$  Hz,  $\text{OH}^2$ ), 4.76 (d, H,  $J_{\text{OH}3\text{-H}3} = 5.0$  Hz,  $\text{OH}^3$ ), 4.90 (dd, 1H,  $J_{\text{H}1\text{-H}2} = 4.0$  Hz,  $J_{\text{H}1\text{-OH}1} = 4.5$  Hz,  $\text{H}^1$ ), 5.05 (d, 1H,  $J_{\text{OH}4\text{-H}4} = 6.0$  Hz,  $\text{OH}^4$ ), 6.35 (d, 1H,  $J_{\text{OH}1\text{-H}1} = 4.5$  Hz,  $\text{OH}^1$ ) ppm.  $^{13}\text{C}$  NMR (100 MHz, DMSO):  $\delta = 14.4$ , 22.6, 24.9, 28.9, 29.1, 29.2, 29.3, 31.7, 33.9, 64.3 (C6), 69.6 (C5), 71.0 (C4), 72.7 (C2), 73.3 (C3), 92.7 (C1), 173.4 (CO) ppm.

**6-*O*-Dodecanoyl-D-glucopyranose (glucose laurate, URB1384) (8c) [3]**

Yield = 15%.  $^1\text{H}$  NMR (400 MHz, DMSO):  $\delta = 0.86$  (t, 3H,  $J = 7.0$  Hz,  $\text{CH}_3$ ), 1.23–1.26 (m, 16H), 1.49–1.52 (m, 2H,  $\text{OCCH}_2\text{CH}_2$ ), 2.27 (t, 2H,  $J = 6.5$  Hz,  $\text{OCCH}_2\text{CH}_2$ ), 3.04 (ddd, 1H,  $J_{\text{H}4\text{-OH}4} = 5.5$  Hz,  $J_{\text{H}4\text{-H}3} = 9.0$  Hz,  $J_{\text{H}4\text{-H}5} = 9.5$  Hz,  $\text{H}^4$ ), 3.12 (ddd, 1H,  $J_{\text{H}2\text{-H}1} = 4.0$  Hz,  $J_{\text{H}2\text{-OH}2} = 6.5$  Hz,  $J_{\text{H}2\text{-H}3} = 9.0$  Hz,  $\text{H}^2$ ), 3.43 (ddd, 1H,  $J_{\text{H}3\text{-OH}3} = 5.0$  Hz,  $J_{\text{H}3\text{-H}2} \cong J_{\text{H}3\text{-H}4} = 9.0$  Hz,  $\text{H}^3$ ), 3.76 (ddd, 1H,  $J_{\text{H}5\text{-H}6b} = 1.5$  Hz,  $J_{\text{H}5\text{-H}6a} = 6.5$  Hz,  $J_{\text{H}5\text{-H}4} = 9.5$  Hz,  $\text{H}^5$ ), 3.99 (dd, 1H,  $J_{\text{H}6a\text{-H}5} = 6.5$  Hz,  $J_{\text{H}6a\text{-H}6b} = 11.5$  Hz,  $\text{H}^{6a}$ ), 4.26 (dd, 1H,  $J_{\text{H}6b\text{-H}5} = 1.5$  Hz,  $J_{\text{H}6b\text{-H}6a} = 11.5$  Hz,  $\text{H}^{6b}$ ), 4.51 (d, 1H,  $J_{\text{OH}2\text{-H}2} = 6.5$  Hz,  $\text{OH}^2$ ), 4.73 (d, H,  $J_{\text{OH}3\text{-H}3} = 5.0$  Hz,  $\text{OH}^3$ ), 4.89 (dd, 1H,  $J_{\text{H}1\text{-H}2} = 4.0$  Hz,  $J_{\text{H}1\text{-OH}1} = 4.5$  Hz,  $\text{H}^1$ ), 5.02 (d, 1H,  $J_{\text{OH}4\text{-H}4}$

= 5.5 Hz, OH<sup>4</sup>), 6.32 (d, 1H,  $J_{\text{OH1-H1}} = 4.5$  Hz, OH<sup>1</sup>) ppm. <sup>13</sup>C NMR (100 MHz, DMSO):  $\delta$  = 14.4, 22.6, 24.9, 28.9, 29.16, 29.18, 29.4, 29.5 (2C), 31.8, 33.9, 64.3 (C6), 69.6 (C5), 71.0 (C4), 72.7 (C2), 73.3 (C3), 92.8 (C1), 173.4 (CO) ppm.

**Tetradecanoyl-D-glucopyranose (glucose myristate, URB1386) (8d) [3]**

Yield = 10%. <sup>1</sup>H NMR (400 MHz, DMSO):  $\delta$  = 0.85 (t, 3H,  $J = 7.0$  Hz, CH<sub>3</sub>), 1.21–1.28 (m, 20H), 1.47–1.54 (m, 2H, OCCH<sub>2</sub>CH<sub>2</sub>), 2.27 (t, 2H,  $J = 6.5$  Hz, OCCH<sub>2</sub>CH<sub>2</sub>), 3.03 (ddd, 1H,  $J_{\text{H4-OH4}} = 5.5$  Hz,  $J_{\text{H4-H3}} = 9.0$  Hz,  $J_{\text{H4-H5}} = 9.5$  Hz, H<sup>4</sup>), 3.13 (ddd, 1H,  $J_{\text{H2-H1}} = 4.0$  Hz,  $J_{\text{H2-OH2}} = 6.5$  Hz,  $J_{\text{H2-H3}} = 9.0$  Hz, H<sup>2</sup>), 3.43 (ddd, 1H,  $J_{\text{H3-OH3}} = 5.0$  Hz,  $J_{\text{H3-H2}} \cong J_{\text{H3-H4}} = 9.0$  Hz, H<sup>3</sup>), 3.77 (ddd, 1H,  $J_{\text{H5-H6b}} = 1.5$  Hz,  $J_{\text{H5-H6a}} = 6.5$  Hz,  $J_{\text{H5-H4}} = 9.5$  Hz, H<sup>5</sup>), 3.99 (dd, 1H,  $J_{\text{H6a-H5}} = 6.5$  Hz,  $J_{\text{H6a-H6b}} = 11.5$  Hz, H<sup>6a</sup>), 4.27 (dd, 1H,  $J_{\text{H6b-H5}} = 1.5$  Hz,  $J_{\text{H6b-H6a}} = 11.5$  Hz, H<sup>6b</sup>), 4.55 (d, 1H,  $J_{\text{OH2-H2}} = 6.5$  Hz, OH<sup>2</sup>), 4.79 (d, 1H,  $J_{\text{OH3-H3}} = 5.0$  Hz, OH<sup>3</sup>), 4.89 (dd, 1H,  $J_{\text{H1-H2}} = 4.0$  Hz,  $J_{\text{H1-OH1}} = 4.5$  Hz, H<sup>1</sup>), 5.06 (d, 1H,  $J_{\text{OH4-H4}} = 5.5$  Hz, OH<sup>4</sup>), 6.36 (d, 1H,  $J_{\text{OH1-H1}} = 4.5$  Hz, OH<sup>1</sup>) ppm. <sup>13</sup>C NMR (100 MHz, DMSO):  $\delta$  = 14.4, 22.6, 24.9, 28.9, 29.18, 29.19, 29.37, 29.48, 29.50, 29.52, 31.8, 33.9, 64.3 (C6), 69.6 (C5), 71.0 (C4), 72.7 (C2), 73.3 (C3), 92.8 (C1), 173.4 (CO) ppm.

**Esadecanoyl-D-glucopyranose (glucose palmitate, URB1387) (8e) [3]**

Yield = 5%. <sup>1</sup>H NMR (400 MHz, DMSO):  $\delta$  = 0.86 (t, 3H,  $J = 7.0$  Hz, CH<sub>3</sub>), 1.19–1.28 (m, 24H), 1.47–1.53 (m, 2H, OCCH<sub>2</sub>CH<sub>2</sub>), 2.27 (t, 2H,  $J = 7.5$  Hz, OCCH<sub>2</sub>CH<sub>2</sub>), 3.04 (ddd, 1H,  $J_{\text{H4-OH4}} = 5.5$  Hz,  $J_{\text{H4-H3}} = 9.0$  Hz,  $J_{\text{H4-H5}} = 9.5$  Hz, H<sup>4</sup>), 3.12 (ddd, 1H,  $J_{\text{H2-H1}} = 4.0$  Hz,  $J_{\text{H2-OH2}} = 6.5$  Hz,  $J_{\text{H2-H3}} = 9.5$  Hz, H<sup>2</sup>), 3.43 (ddd, 1H,  $J_{\text{H3-OH3}} = 4.5$  Hz,  $J_{\text{H3-H2}} \cong J_{\text{H3-H4}} = 9.5$  Hz, H<sup>3</sup>), 3.77 (ddd, 1H,  $J_{\text{H5-H6b}} = 1.5$  Hz,  $J_{\text{H5-H6a}} = 6.0$  Hz,  $J_{\text{H5-H4}} = 9.0$  Hz, H<sup>5</sup>), 3.99 (dd, 1H,  $J_{\text{H6a-H5}} = 6.0$  Hz,  $J_{\text{H6a-H6b}} = 11.5$  Hz, H<sup>6a</sup>), 4.27 (dd, 1H,  $J_{\text{H6b-H5}} = 1.5$  Hz,  $J_{\text{H6b-H6a}} = 11.5$  Hz, H<sup>6b</sup>), 4.51 (d, 1H,  $J_{\text{OH2-H2}} = 6.5$  Hz, OH<sup>2</sup>), 4.74 (d, 1H,  $J_{\text{OH3-H3}} = 4.5$  Hz, OH<sup>3</sup>), 4.90 (dd, 1H,  $J_{\text{H1-H2}} \cong J_{\text{H1-OH1}} = 4.0$  Hz, H<sup>1</sup>), 5.02 (d, 1H,  $J_{\text{OH4-H4}} = 5.5$  Hz, OH<sup>4</sup>), 6.34 (d, 1H,  $J_{\text{OH1-H1}} = 4.0$  Hz, OH<sup>1</sup>) ppm. <sup>13</sup>C NMR (100 MHz, DMSO):  $\delta$  = 14.4, 22.6, 24.9, 28.9, 29.16 (2C), 29.19, 29.36, 29.46 (2C), 29.5 (2C), 31.2, 31.8, 33.9, 64.3 (C6), 69.6 (C5), 71.0 (C4), 72.7 (C2), 73.3 (C3), 92.8 (C1), 173.4 (CO) ppm.

## 2. Synthesis of triphenylacetic acid (**1i**) (Scheme S1).

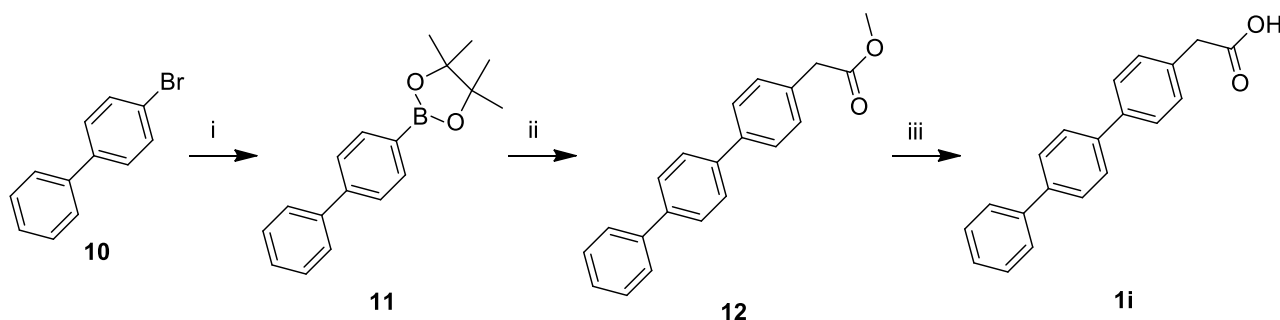

**Scheme 1S.** Reagents and conditions: (i)  $B_2pin_2$ ,  $Pd(dppf)Cl_2/CH_2Cl_2$ ,  $dppf$ ,  $KOAc$ , dry dioxane,  $80^\circ C$ , 16 h; ii) methyl 2-(4-bromophenyl)acetate,  $Pd(II)(dba)_3$ ,  $PCy_3$ ,  $K_3PO_4/H_2O$ , dioxane:H<sub>2</sub>O 2:1,  $75^\circ C$ , 16 h; iii)  $LiOH$ , MeOH:H<sub>2</sub>O 3:1,  $60^\circ C$ , 5 h.

### Methyl 2-(4-bromophenyl)acetate (**11**) [4]

A mixture of *p*-phenylbromobenzene (0.534 g, 2.29 mmol) (**10**),  $B_2pin_2$  (1.635 g, 6.44 mmol),  $Pd(dppf)Cl_2$  in  $CH_2Cl_2$  (0.170 g, 0.21 mmol),  $dppf$  (0.083 g, 0.15 mmol) and  $KOAc$  (1.320 g, 13.43 mmol) in dry dioxane (11.6 mL) was stirred at  $80^\circ C$  for 20 h, then filtered on Celite<sup>®</sup>, and extracted with EtOAc. The combined organic layers were washed with H<sub>2</sub>O, dried ( $Na_2SO_4$ ), and concentrated. The purification of the residue by column chromatography (cyclohexane/EtOAc 98:2) gave **11** as a white solid. Yield = 96%.  $^1H$  NMR (400 MHz,  $CDCl_3$ ):  $\delta$  = 1.29 (s, 12H, 6 CH<sub>3</sub>), 7.26–7.31 (m, 1H, ArH), 7.35–7.39 (m, 2H, ArH), 7.53–7.56 (m, 4H, ArH), 7.81–7.83 (m, 2H, ArH).

### Methyl 2-[(1,1':4',1''-triphenyl)-4-yl]acetate (**12**) [4]

A  $K_3PO_4$  1.27 M aqueous solution (4 mL) was added to solution of **11** (0.999 g, 3.57 mmol), methyl 2-(4-bromophenyl)acetate (0.682 g, 2.98 mmol),  $Pd_2(dba)_3$  (0.164 g, 0.18 mmol),  $PCy_3$  (0.114 g, 0.41 mmol) in a mixture 2:1 dioxane/H<sub>2</sub>O (8 mL). The solution was stirred at  $80^\circ C$  for 20 h, then filtered on Celite<sup>®</sup>, and extracted with EtOAc. The combined organic layers were washed with H<sub>2</sub>O, dried ( $Na_2SO_4$ ), and concentrated. The purification by column chromatography (cyclohexane/EtOAc 98:2 then petroleum ether/Et<sub>2</sub>O 95:5) gave **12** as a white solid. Yield = 47%.  $^1H$  NMR (400 MHz,  $CDCl_3$ ):  $\delta$  = 3.62 (s, 2H, CH<sub>2</sub>), 3.65 (s, 3H, CH<sub>3</sub>), 7.29–7.31 (m, 3H, ArH), 7.34–7.41 (m, 2H, ArH), 7.53–

7.58 (m, 4H, ArH), 7.59–7.61 (m, 4H, ArH) ppm.  $^{13}\text{C}$  NMR (100 MHz,  $\text{CDCl}_3$ )  $\delta$  = 40.8, 52.1, 127.0, 127.2, 127.3, 127.4, 127.5, 128.8, 129.7, 133.1, 139.6, 139.7, 140.2, 140.7, 172.0 ppm.

#### 2-[(1,1',4',1''-triphenyl)4-yl]acetic acid (**1i**) [5]

A solution of **12** (0.420 g, 1.39 mmol) and LiOH (0.292 g, 6.95 mmol) in a mixture 3:1 MeOH/ $\text{H}_2\text{O}$  (9.3 mL) was stirred at 60 °C for 5 h, then acidified with HCl 2N to pH = 2, and extracted with EtOAc. The combined organic layers were washed with  $\text{H}_2\text{O}$ , dried ( $\text{Na}_2\text{SO}_4$ ), and concentrated. The purification by recrystallization from EtOAc gave **1i** as a white solid. Yield = 79%. Mp = 266-268 °C. MS (ESI): 289  $[\text{M} + \text{H}]^+$ , 287  $[\text{M} - \text{H}]^-$ , 243  $[\text{M} - \text{COOH}]^-$ .  $^1\text{H}$  NMR (400 MHz, DMSO):  $\delta$  = 3.64 (s, 2H,  $\text{CH}_2$ ), 7.37–7.40 (m, 3H, ArH), 7.47–7.51 (m, 2H, ArH), 7.67–7.69 (m, 2H, ArH), 7.72–7.74 (m, 2H, ArH), 7.75–7.78 (m, 4H, ArH), 12.36 (brs, 1H, COOH) ppm.  $^{13}\text{C}$  NMR (100 MHz, DMSO)  $\delta$  = 40.8 ( $\text{CH}_2$ ), 126.9, 127.0, 127.52, 127.56, 127.7, 128.0, 129.5, 130.5, 134.9, 138.4, 139.4, 139.5, 140.1, 173.11 ppm.

#### 4. References

- [1] Watanabe, Y.; Miyawaki, Y.; Adachi, S.; Adachi, S.; Nakanishi, K.; Matsuno, R. Continuous production of acyl mannoses by immobilized lipase using a packed-bed reactor and their surfactant properties. *Biochem. Eng. J.* **2001**, 8, 213–216.
- [2] AlFindee, M.N.; Zhang, Q.; Subedi, Y.P.; Shrestha, J.P.; Kawasaki, Y.; Grilley, M.; Takemoto, J.Y.; Chang, C.W.T. One-step synthesis of carbohydrate esters as antibacterial and antifungal agents. *Bioorg. Med. Chem.* **2018**, 26, 765–774.
- [3] Yosimoto, K.; Tahara, K.; Suzuki, S.; Sasaki, K.; Nishikawa, Y.; Tsuda, Y. Regioselective syntheses of mono-*O*-acylglucoses. *Chem. Pharm. Bull.* **1979**, 27, 2661–2674.
- [4] Seath, C.P.; Fyfe, J.W.B.; Molloy, J.J.; Watson, A.J.B. Tandem chemoselective Suzuki-Miyaura cross-coupling enabled by nucleophile speciation control. *Angew. Chemie* **2015**, 54, 9976–9979.
- [5] Liphardt, B.; Luetke, W. laser dyes. I. Bifluorophoric laser dyes for increase of the efficient of dye lasers. *Liebigs Ann. Chem.* **1981**, 6, 1118–1138.
